# Supplementary material for: Exosomes from human colorectal cancer induce a tumor-like behavior in colonic mesenchymal stromal cells
Source: PubMed Central journal article supplement (PMC5226570; doi:10.18632/oncotarget.10574), 2016-07-13
Supplement: oncotarget-07-50086-s001.pdf [file oncotarget-07-50086-s001.pdf]

# Exosomes from human colorectal cancer induce a tumor-like behavior in colonic mesenchymal stromal cells

## Supplementary Materials

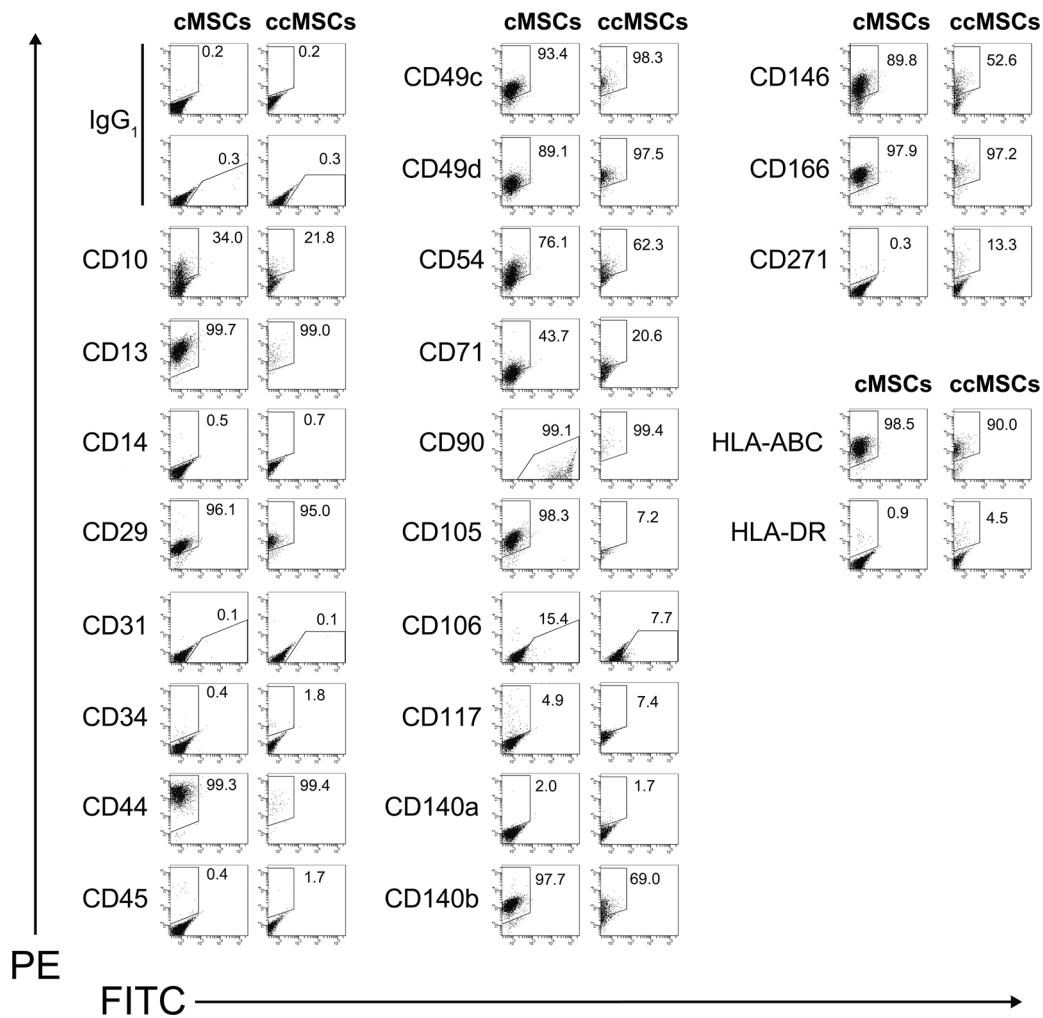

Supplementary Figure S1: Flow cytometry characterization of colonic MSCs (cMSCs) and colon cancer MSCs (ccMSCs), as in part reported in Signore et al., 2012 manuscript.

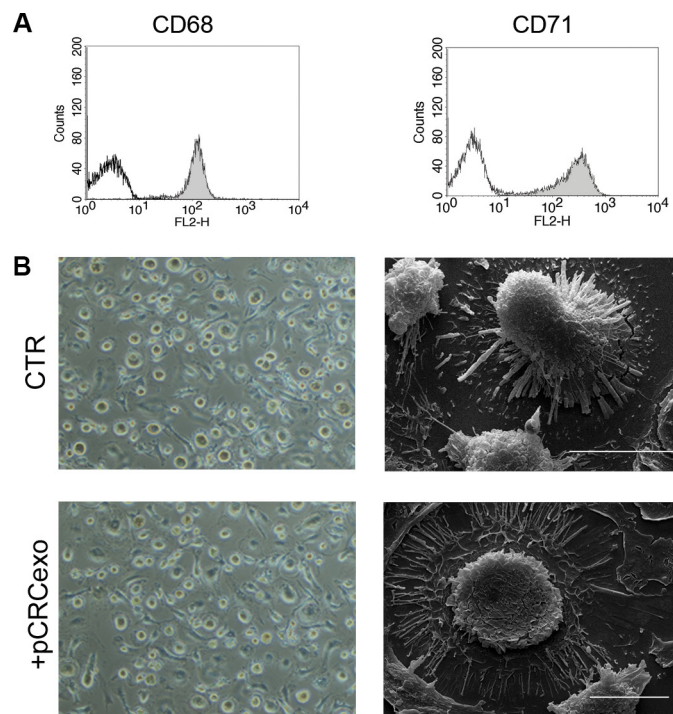

**Supplementary Figure S2:** (A) Flow cytometry characterization of macrophage cells. (B) Phase contrast microscopy (left panels) and scanning electron microscopy (right panels) images of macrophages ( $\Phi$ M) treated for 6 days with SW480 primary CRC exosomes (pCRCexo). 20X magnification in phase contrast microscopy images; 20  $\mu$ M scale bar in scanning electron microscopy images. Representative images of two independent experiments are reported.

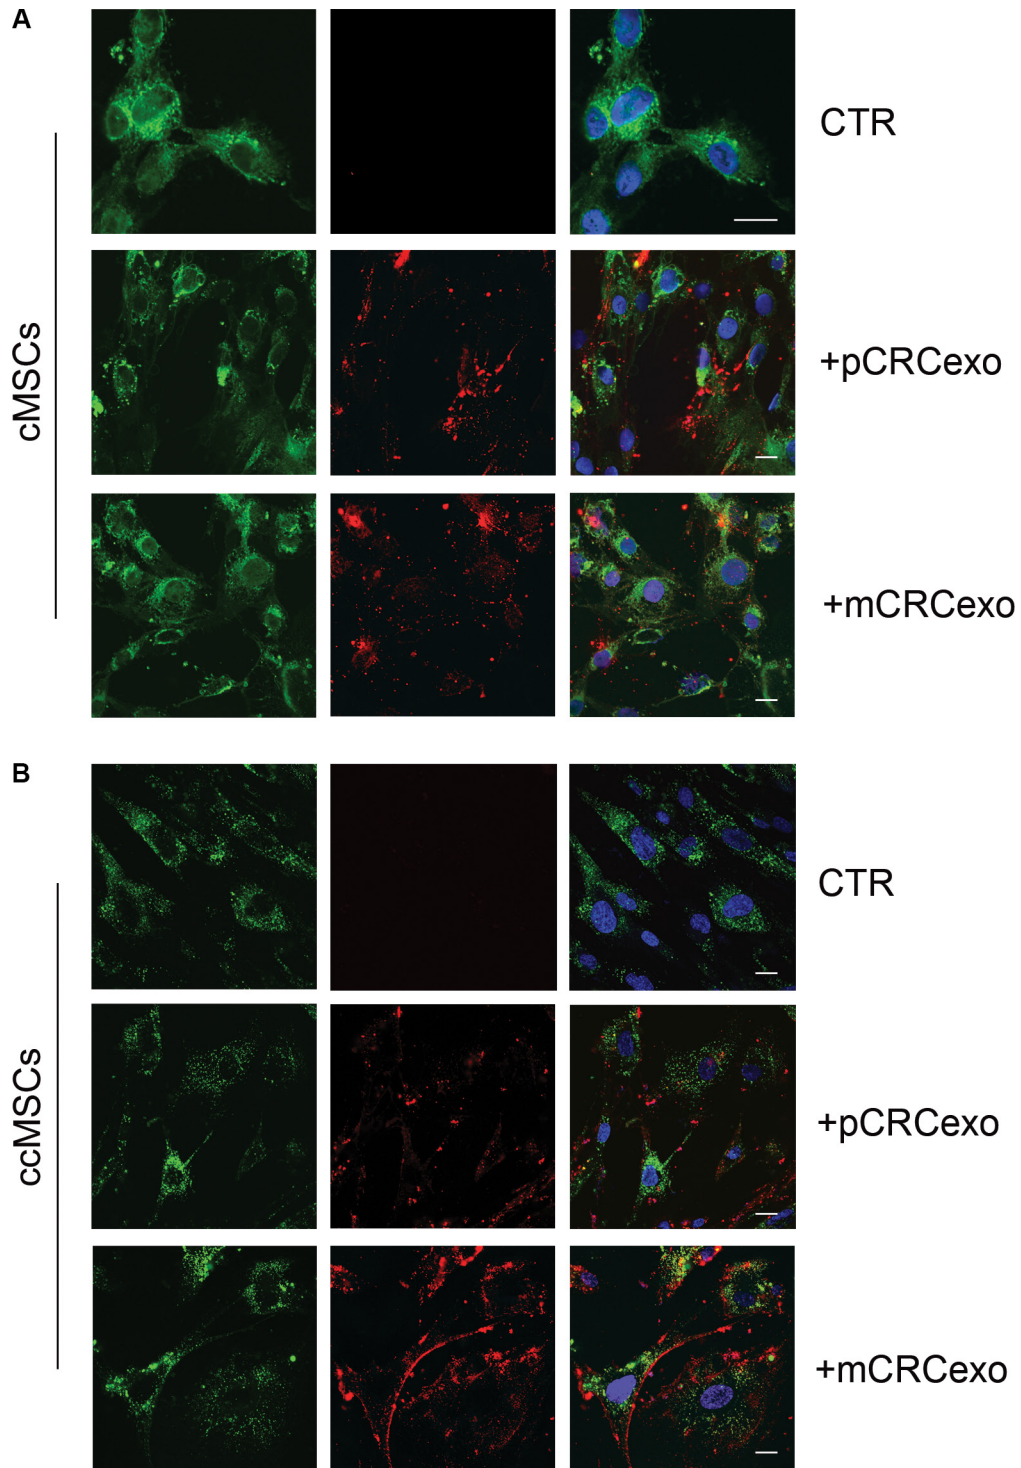

**Supplementary Figure S3: Colorectal cancer exosomes are internalized by colonic and colon cancer MSCs.** Confocal laser scanning microscopy of cMSCs (**A**) and ccMSCs (**B**) cells, both labeled with PKH-67 green fluorescent dye, incubated for 3 hours with pCRCexo or mCRCexo, both labeled with NHS-Rhodamine red fluorescent dye. Nuclei are reported in blue (DAPI).

cc2MSCs

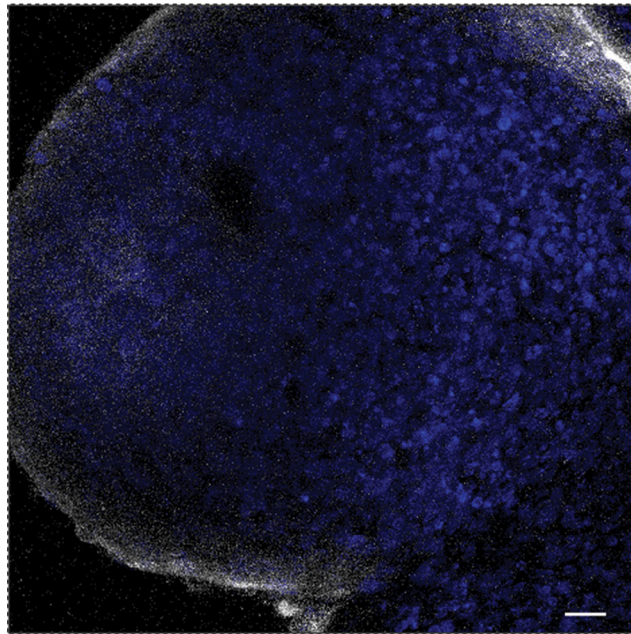

**Supplementary Figure S4: Confocal laser scanning microscopy of a spheroid from a colon cancer MSCs (cc2MSCs) obtained in specific culture condition for 72 hours, as described in Materials and Methods. V-ATPase protein expression was reported in white, nuclei are reported in blue (DAPI). Scale bars, 20  $\mu$ M.**
